# Supplementary material for: Oil bodies extracted from high-oil soybeans (Glycine max) exhibited higher oxidative and physical stability than oil bodies from high-protein soybeans
Source: Royal Society of Chemistry journal article supplement (doi:10.1039/d1fo03934b), 2022-01-01
Supplement: d1fo03934b1.pdf [file d1fo03934b1.pdf]

Table 1s. Characteristic, origin and pedigree and days-to-maturity of different soybean genotypes selected for the investigation.

| Genotype      | Characteristic | Origin              | Pedigree                               | Days-to-maturity (days) | Soybean oil body Codes |
|---------------|----------------|---------------------|----------------------------------------|-------------------------|------------------------|
| Jidou 12      | High protein   | Hebei, China        | You 83-14 × Jida 7826                  | 95                      | HP1                    |
| Zhonghuang 13 | High protein   | Hunan, China        | Jidou 8 × Zhong 90052-76               | 130                     | HP2                    |
| Hedou 33      | High protein   | Shandong, China     | Hedou 20 × F6 (Zhongzuo 975 × Xu 8906) | 102                     | HP3                    |
| Zhonghuang 39 | High oil       | Hebei, China        | Zhongpin 661 × Zhonghuang 14           | 103                     | HO1                    |
| Zhonghuang 57 | High oil       | Hunan, China        | Hartwig × Ji 1265                      | 106                     | HO2                    |
| Dongnong 68   | High oil       | Heilongjiang, China | Hefeng 50 × Jiusan 03-42               | 120                     | HO3                    |

Table 2s. Proximate composition (g/100 g) of different soybean seeds and the soybean oil bodies isolated from the different soybeans and yield of soybean oil bodies isolated from the different soybeans

| Sample | Soybean                 |                         | soybean oil bodies       |                          |                          | Yield of soybean oil bodies (dry basis) |
|--------|-------------------------|-------------------------|--------------------------|--------------------------|--------------------------|-----------------------------------------|
|        | Protein                 | Crude lipid             | Moisture                 | Protein (dry basis)      | Crude lipid (dry basis)  |                                         |
| HP1    | 42.95±0.24 <sup>c</sup> | 19.26±0.06 <sup>c</sup> | 55.43±0.30 <sup>ab</sup> | 21.52±0.61 <sup>a</sup>  | 76.46±0.58 <sup>b</sup>  | 14.08±0.71 <sup>b</sup>                 |
| HP2    | 46.32±0.66 <sup>a</sup> | 13.43±0.31 <sup>e</sup> | 56.11±0.65 <sup>a</sup>  | 20.18±1.14 <sup>ab</sup> | 77.87±1.12 <sup>ab</sup> | 9.60±0.47 <sup>d</sup>                  |
| HP3    | 44.08±0.26 <sup>b</sup> | 17.35±0.01 <sup>d</sup> | 55.08±0.06 <sup>b</sup>  | 21.34±0.45 <sup>a</sup>  | 76.76±0.32 <sup>b</sup>  | 12.49±0.11 <sup>c</sup>                 |
| HO1    | 40.22±0.14 <sup>d</sup> | 20.82±0.13 <sup>b</sup> | 52.65±0.27 <sup>d</sup>  | 20.66±0.95 <sup>ab</sup> | 77.55±0.73 <sup>ab</sup> | 15.18±0.21 <sup>a</sup>                 |
| HO2    | 38.60±0.50 <sup>e</sup> | 21.02±0.04 <sup>b</sup> | 53.58±0.43 <sup>c</sup>  | 19.45±0.66 <sup>b</sup>  | 78.70±0.56 <sup>a</sup>  | 14.78±0.94 <sup>ab</sup>                |
| HO3    | 37.91±0.40 <sup>e</sup> | 22.17±0.30 <sup>a</sup> | 53.73±0.26 <sup>c</sup>  | 20.69±1.16 <sup>ab</sup> | 77.53±0.95 <sup>ab</sup> | 15.02±0.43 <sup>ab</sup>                |

Different letters within column (a-e) represent the statistically significant differences ( $p < 0.05$ ) between the mean values.

Table 3s. Fatty acid composition of the soybean oil bodies isolated from the different soybeans (%)

|     | C16:0                   | C18:0                  | C18:1                   | C18:2                   | C18:3                  | PUFA                    | UFA                     |
|-----|-------------------------|------------------------|-------------------------|-------------------------|------------------------|-------------------------|-------------------------|
| HP1 | 12.05±0.05 <sup>a</sup> | 3.73±0.01 <sup>d</sup> | 18.59±0.06 <sup>e</sup> | 53.72±0.04 <sup>a</sup> | 8.83±0.03 <sup>b</sup> | 62.56±0.01 <sup>a</sup> | 81.53±0.03 <sup>d</sup> |
| HP2 | 10.84±0.01 <sup>e</sup> | 3.01±0.00 <sup>f</sup> | 23.28±0.05 <sup>c</sup> | 50.45±0.05 <sup>c</sup> | 9.11±0.02 <sup>a</sup> | 59.56±0.07 <sup>c</sup> | 83.42±0.00 <sup>a</sup> |
| HP3 | 11.00±0.01 <sup>d</sup> | 3.29±0.00 <sup>e</sup> | 22.17±0.02 <sup>d</sup> | 52.76±0.08 <sup>b</sup> | 7.41±0.01 <sup>c</sup> | 60.17±0.08 <sup>b</sup> | 80.79±0.01 <sup>e</sup> |
| HO1 | 11.97±0.02 <sup>b</sup> | 4.44±0.02 <sup>b</sup> | 24.57±0.05 <sup>b</sup> | 49.68±0.01 <sup>d</sup> | 5.98±0.02 <sup>e</sup> | 55.66±0.02 <sup>d</sup> | 80.66±0.01 <sup>f</sup> |
| HO2 | 11.75±0.02 <sup>c</sup> | 4.47±0.01 <sup>a</sup> | 24.60±0.07 <sup>b</sup> | 49.47±0.00 <sup>e</sup> | 6.16±0.03 <sup>f</sup> | 55.63±0.03 <sup>d</sup> | 82.85±0.06 <sup>b</sup> |
| HO3 | 11.70±0.03 <sup>c</sup> | 3.87±0.00 <sup>c</sup> | 26.24±0.04 <sup>a</sup> | 48.59±0.02 <sup>f</sup> | 6.76±0.02 <sup>d</sup> | 55.35±0.00 <sup>e</sup> | 81.89±0.06 <sup>c</sup> |

Different letters within column (a-e) represent the statistically significant differences ( $p < 0.05$ ) between the mean values.

Table 4s. Pearson correlation coefficients of the minor components and physicochemical properties of the soybean oil bodies isolated from the different soybeans

|                        | DPPH <sub>MeOH</sub> | DPPH <sub>Hexane</sub> | ABTS <sub>MeOH</sub> | ABTS <sub>Hexane</sub> | d 4.3-SDS<br>reaction<br>rate | d 4.3-water<br>reaction<br>rate | LPO<br>reaction<br>rate | TBARS<br>reaction<br>rate |
|------------------------|----------------------|------------------------|----------------------|------------------------|-------------------------------|---------------------------------|-------------------------|---------------------------|
| TPC                    | -0.18                | -0.30                  | 0.47*                | -0.33                  | 0.59*                         | 0.32                            | 0.16                    | 0.54*                     |
| α-tocopherol           | -0.08                | 0.36                   | -0.14                | 0.51*                  | -0.59**                       | 0.03                            | -0.60**                 | -0.53*                    |
| γ-tocopherol           | -0.46*               | 0.83**                 | -0.32                | 0.89**                 | -0.59**                       | -0.37                           | -0.74**                 | -0.77**                   |
| δ-tocopherol           | -0.33                | 0.81**                 | -0.43*               | 0.85**                 | -0.67**                       | -0.50*                          | -0.7**                  | -0.78**                   |
| Total-<br>tocopherols  | -0.43*               | 0.82**                 | -0.33                | 0.90**                 | -0.65**                       | -0.35                           | -0.78**                 | -0.80**                   |
| LPO reaction<br>rate   | 0.10*                | -0.76**                | 0.40*                | -0.70**                | 0.69**                        | 0.55*                           | 1.00                    | 0.75**                    |
| TBARS<br>reaction rate | 0.06                 | -0.62**                | 0.45*                | -0.77**                | 0.65**                        | 0.36                            | 0.75**                  | 1.00                      |

\*\* $p < 0.01$ , \* $p < 0.05$ .
